# Supplementary material for: Entry of water into the distal heme pocket of soluble guanylate cyclase β1 H-NOX domain alters the ligated CO structure: a resonance Raman and in silico simulation study
Source: Royal Society of Chemistry journal article supplement (doi:10.1039/c6ra06515e), 2016-01-01
Supplement: c6ra06515e1.pdf [file c6ra06515e1.pdf]

## Electronic Supplementary Information (ESI)

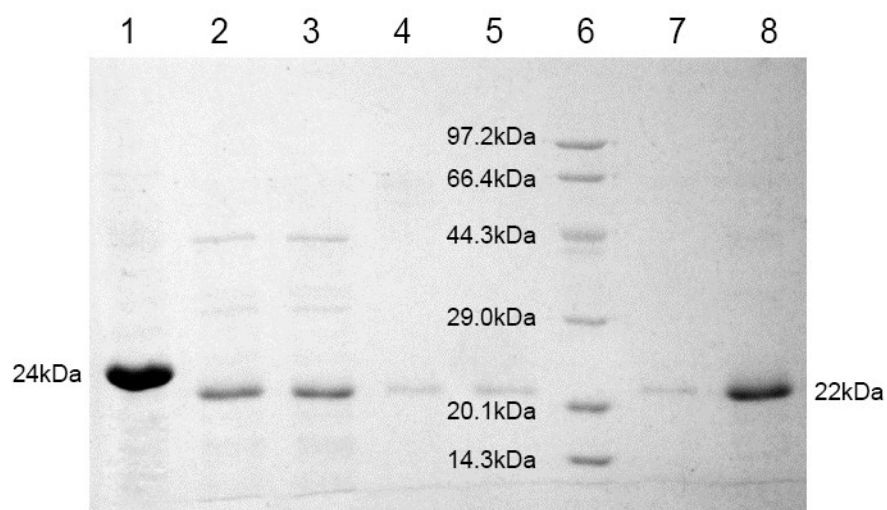

**Fig. S1** The 15% SDS-PAGE of sGC  $\beta 1_{(1-194)}$  (Lane 1), Marker (Lane 6) and *Ns* H-NOX (Lane 8)

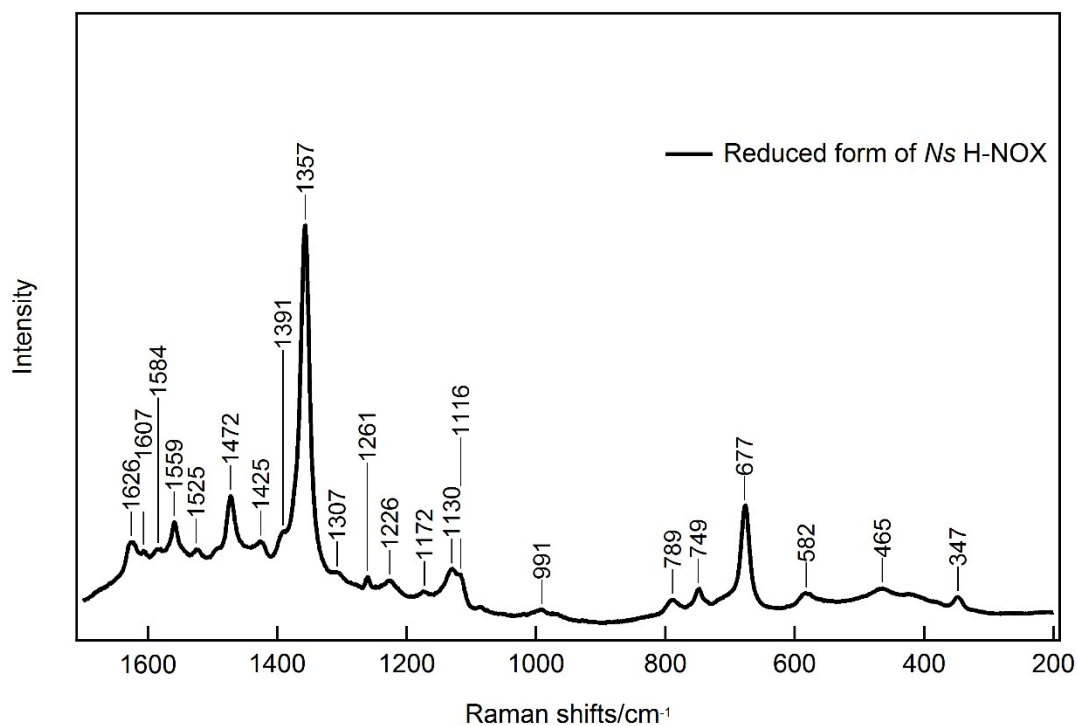

**Fig. S2** Resonance Raman spectrum of the reduced form of *Ns* H-NOX using an excitation wavelength of 413.1 nm.

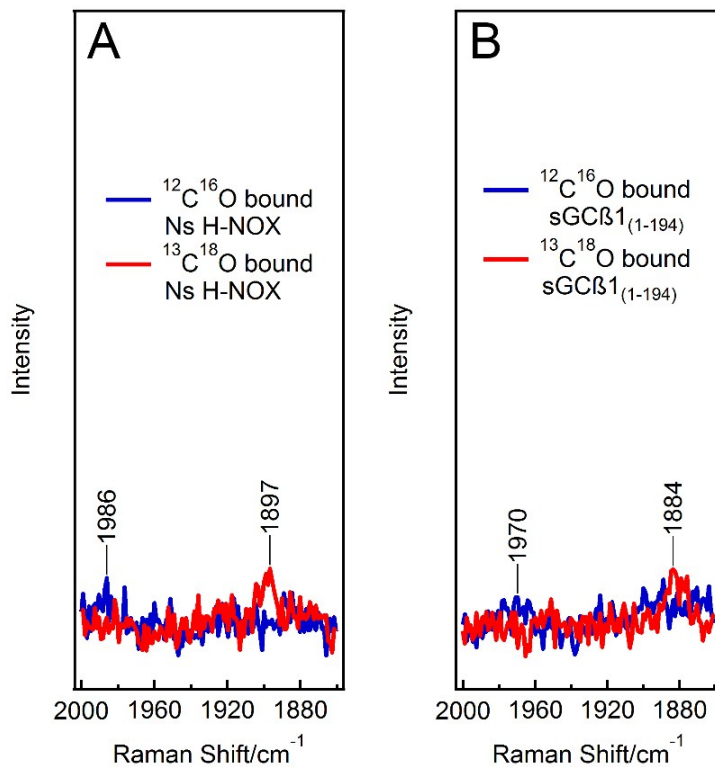

**Fig. S3** High-frequency Raman spectra of *Ns* H-NOX, with <sup>12</sup>C<sup>16</sup>O complex colored blue and <sup>13</sup>C<sup>18</sup>O complex colored red. (A) *Ns* H-NOX; (B) sGC β1<sub>(1-194)</sub>.

#### Backbone RMSD

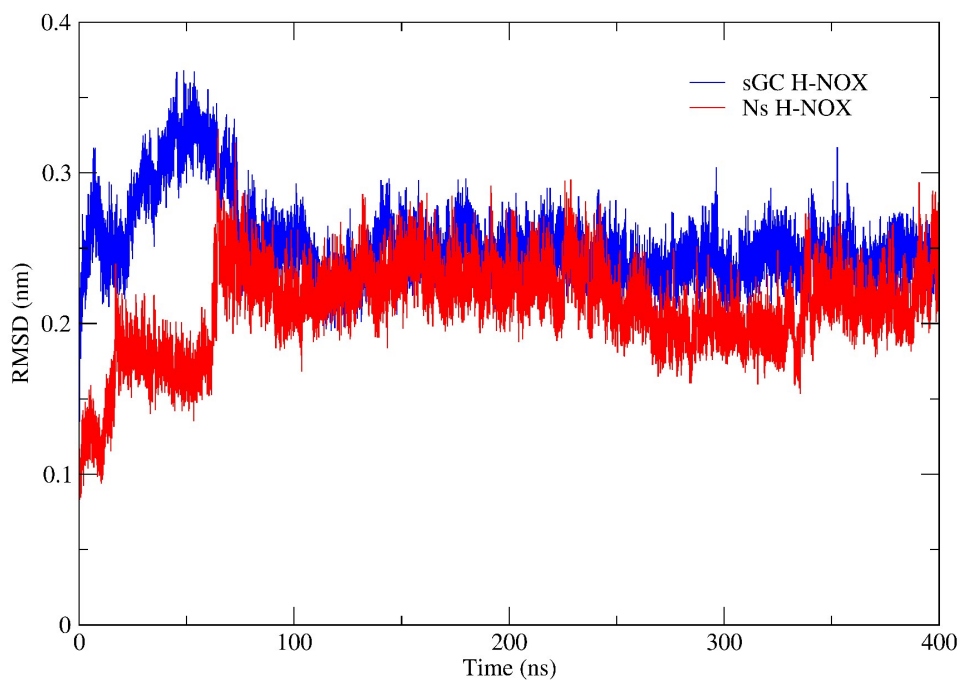

**Fig. S4** Backbone root-mean-square deviation (RMSD) of the two H-NOX proteins during MD simulations (blue for sGC H-NOX; red for *Ns* H-NOX).

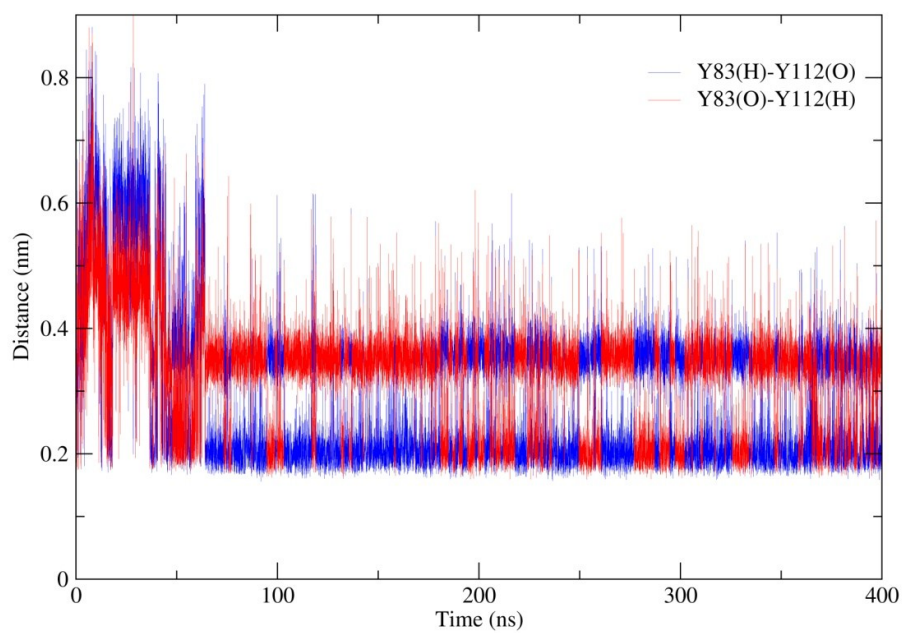

**Fig. S5** Hydrogen bond formed between Y112 and Y83 in sGC H-NOX, which leads to the bending of  $\alpha$ F that subsequently affects the heme position.

**Table S1** Comparison of the UV-visual spectra of the *Ns* H-NOX and sGC  $\beta 1$  (1-194) proteins before and after the Raman measurement.

| nm       | <i>Ns</i> H-NOX |       | sGC $\beta 1$ (1-194) |       |
|----------|-----------------|-------|-----------------------|-------|
|          | before          | after | before                | after |
| Soret    | 423             | 423   | 422                   | 422   |
| $\beta$  | 538             | 538   | 540                   | 540   |
| $\alpha$ | 566             | 566   | 570                   | 570   |

**Table S2.** Selected DFT-optimized parameters of (ImH)FeP(CO) in the absence or presence of water.

|                                     | Absence of water | Presence of water |
|-------------------------------------|------------------|-------------------|
| $R_{\text{H bonding}} (\text{\AA})$ |                  | 2.237             |
| $R_{\text{C=O}} (\text{\AA})$       | 1.151            | 1.154             |
| $R_{\text{Fe-CO}} (\text{\AA})$     | 1.797            | 1.784             |
| $R_{\text{Fe-N}} (\text{\AA})$      | 2.079            | 2.078             |

### Sequence alignment file used for homology modelling

>P1;2o09

structureX:2o09\_A: 1 :A:+184 :A::-1.00:-1.00

MYGLVNKAIQDMISKHHGEDTWEAIKQKAGLEDIDFFVGMEAYSDDVYHLVGAASEVLGKPAEELLIAFGEYVW  
 TYTSEEGYGELLASAGDSLPEFMENLDNLHARVGLSFPQLRPPAFECQHTSS-KSMELHYQSTRCGLAPMVLGLL  
 HGLGKRFQTKVEVTQTAFRETGEDHDIFSIKYEhb\*

>P1;rat\_sgc

sequence:rat\_sgc: : : : 0.00: 0.00

MYGFVNHALELLVIRNYGPEVWEDIKKEAQLDEEGQFLVRIIYDDSKTYDLVAAASKVLNLNAGEILQMFQKMF  
 VFCQESGYDTILRVLGSNREFLHNLDALHDHLATIYPGMRAPFRCTDAEKGKGLILHYYSEREGLDIVIGII  
 KTVAAQQIHGTEIDMKVIQRSEECDHTQFLIEEhb\*
